# Supplementary material
Source: publisher figshare collection journal article supplement (https://tandf.figshare.com/articles/dataset/_/1621907)

**Figure S4**

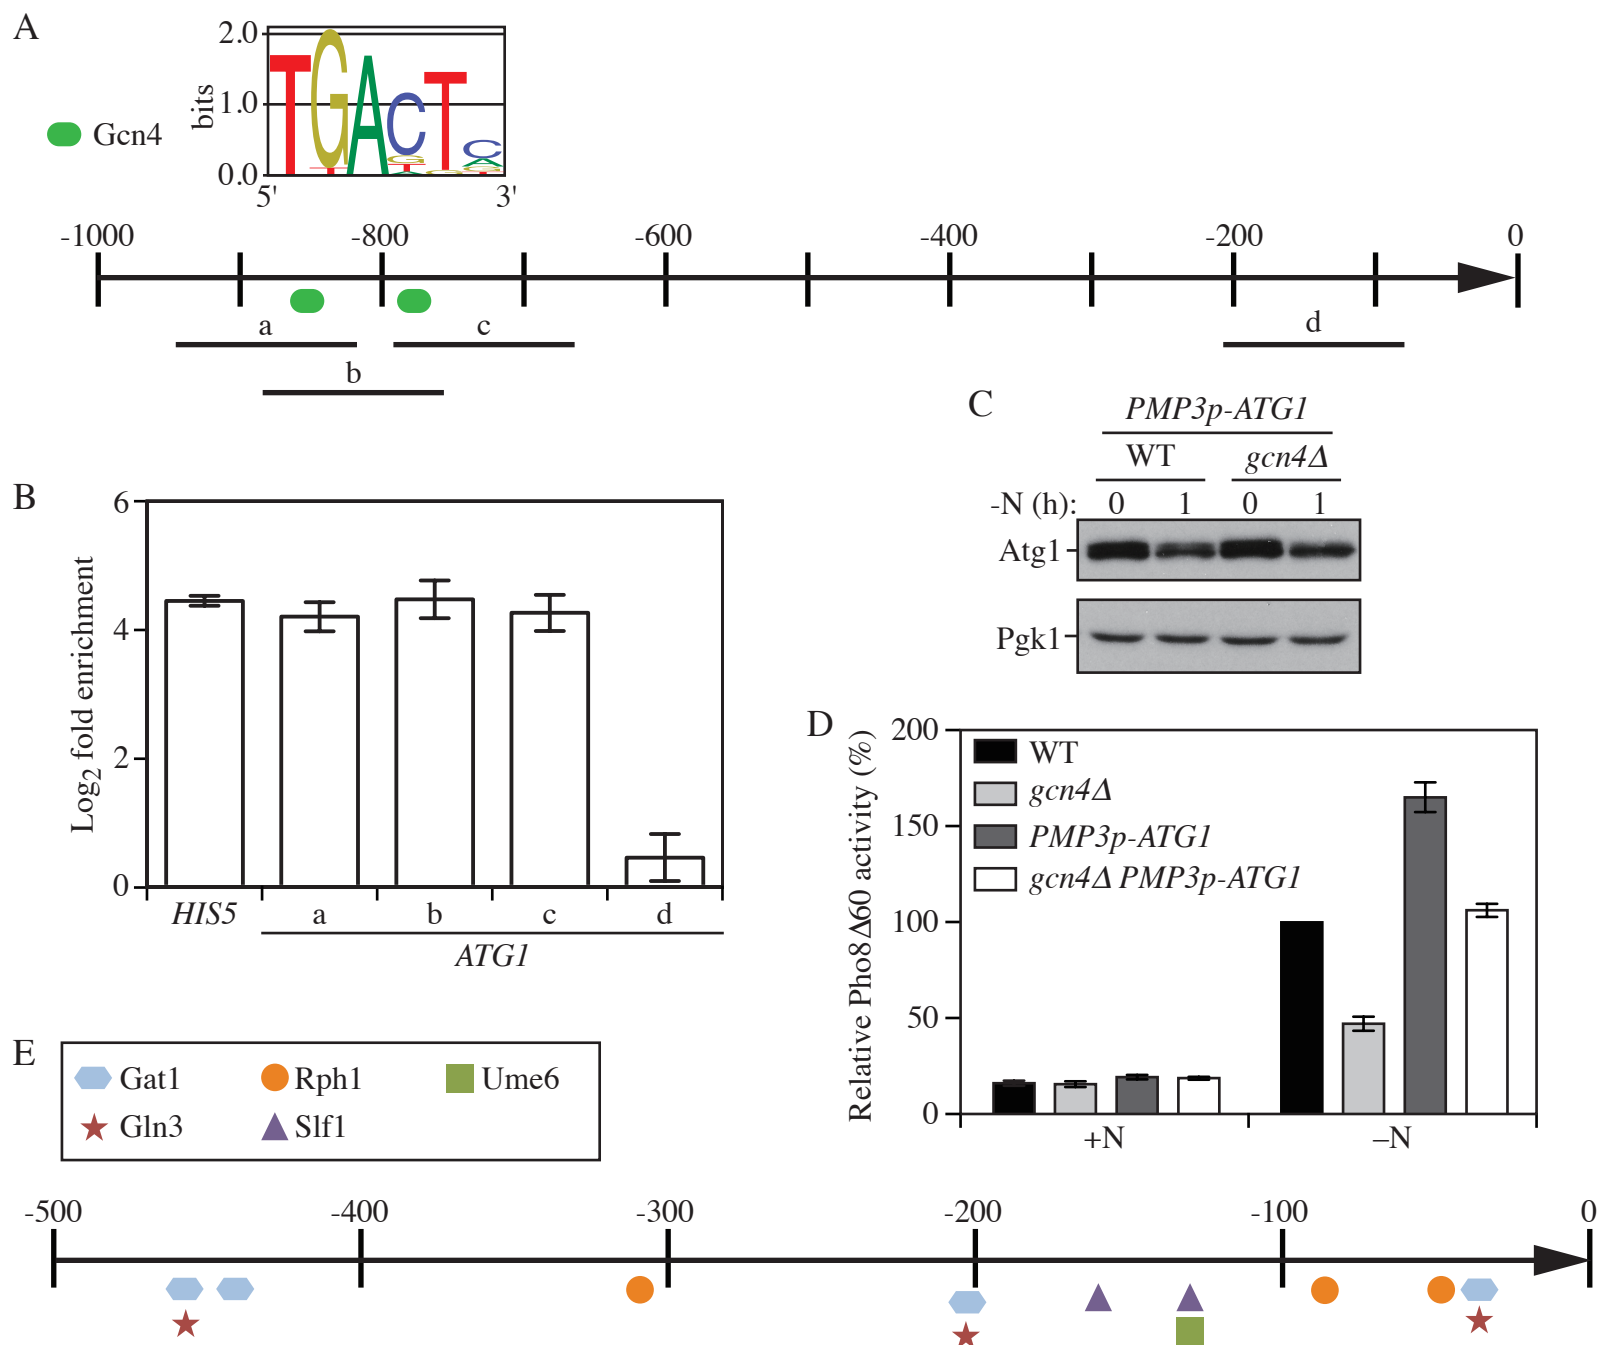

Supplement: Supplementary file 1 [file 1]

Figure S1

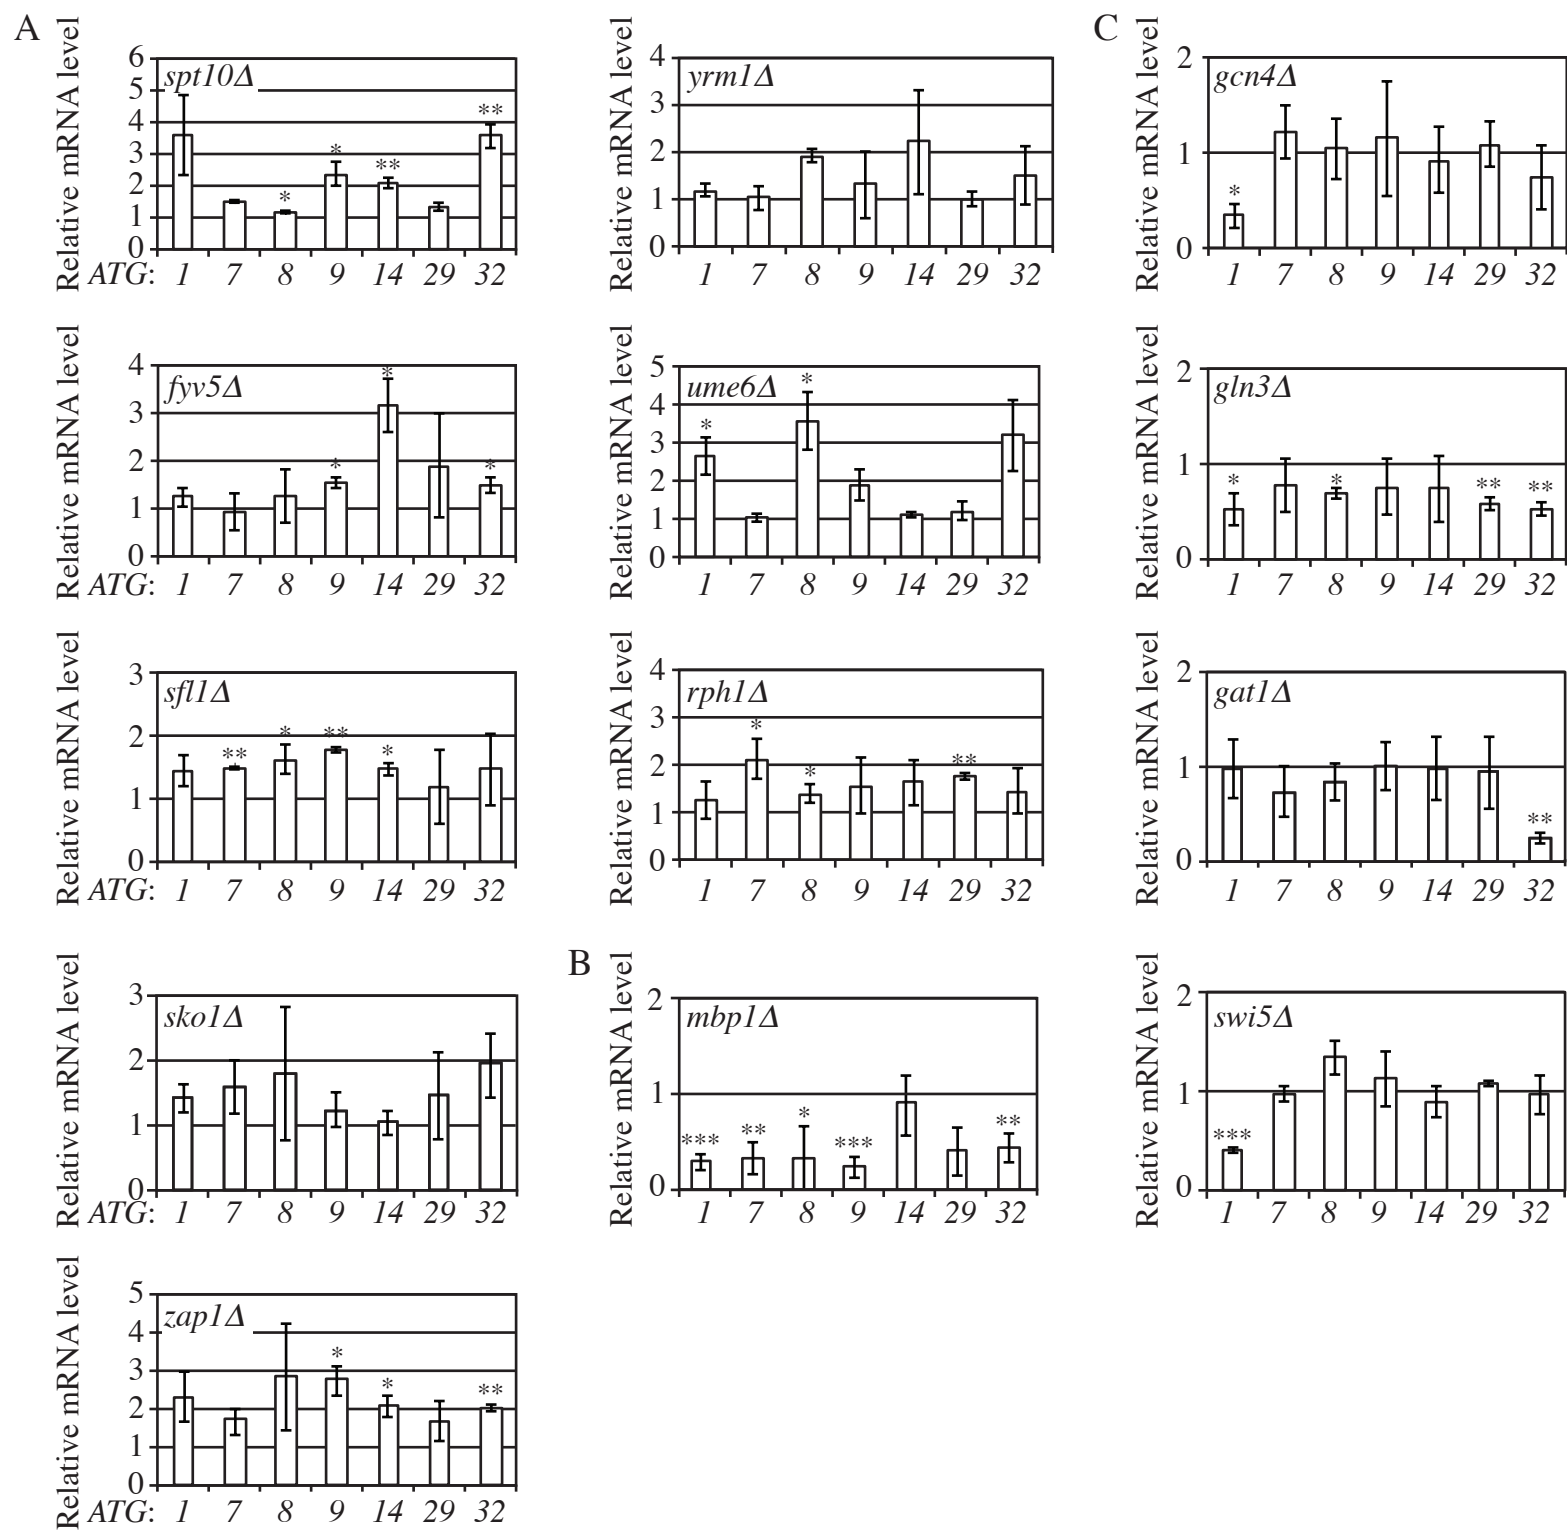

Supplement: Supplementary file 2 [file 1]

**Figure S3**

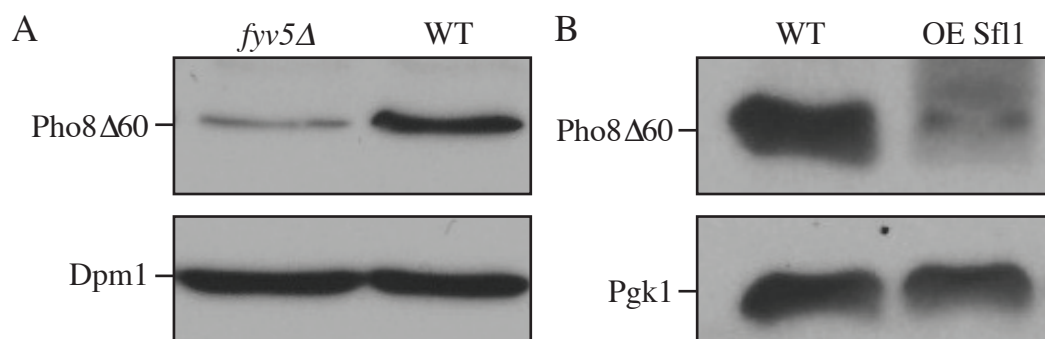

Supplement: Supplementary file 3 [file 1]

**Figure S2**

**A**

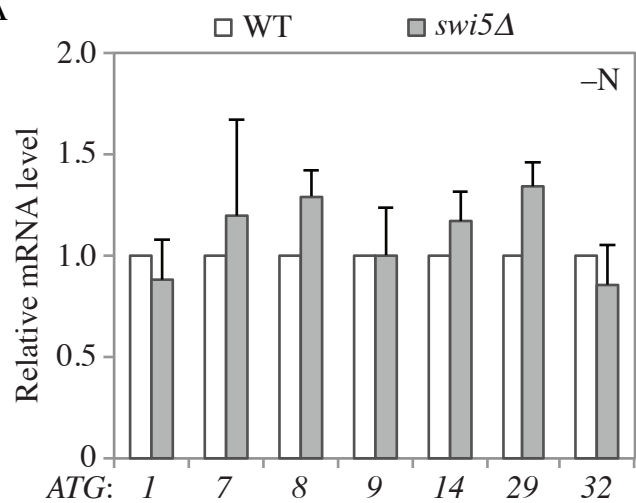

**B**

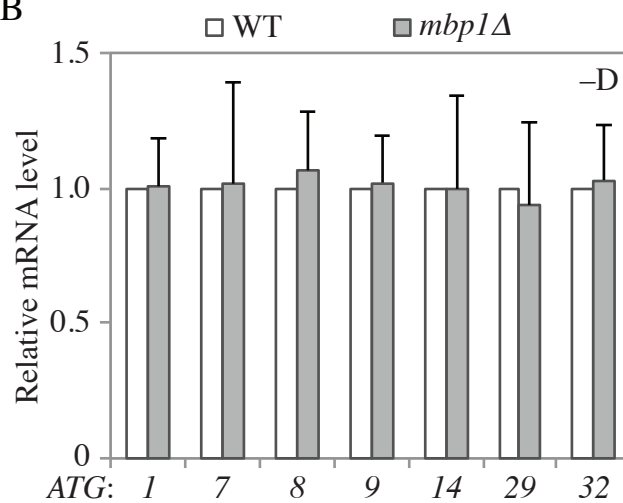

**C**

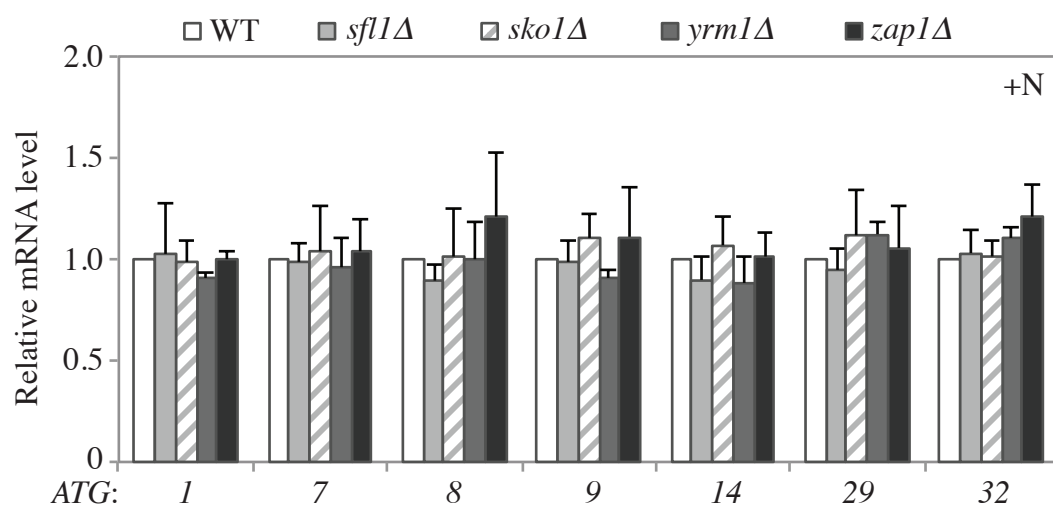

Supplement: Supplementary file 4 [file 1]
